# Supplementary material for: NUP-1 Is a Large Coiled-Coil Nucleoskeletal Protein in Trypanosomes with Lamin-Like Functions
Source: PubMed Central journal article supplement (PMC3313915; doi:10.1371/journal.pbio.1001287), 2012-03-27
Supplement: pbio.1001287.s003.pdf [file pbio.1001287.s003.pdf]

**A**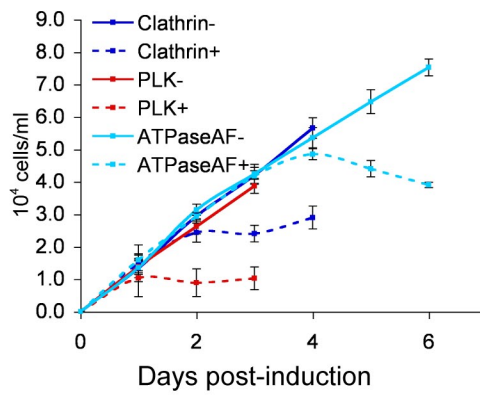**B**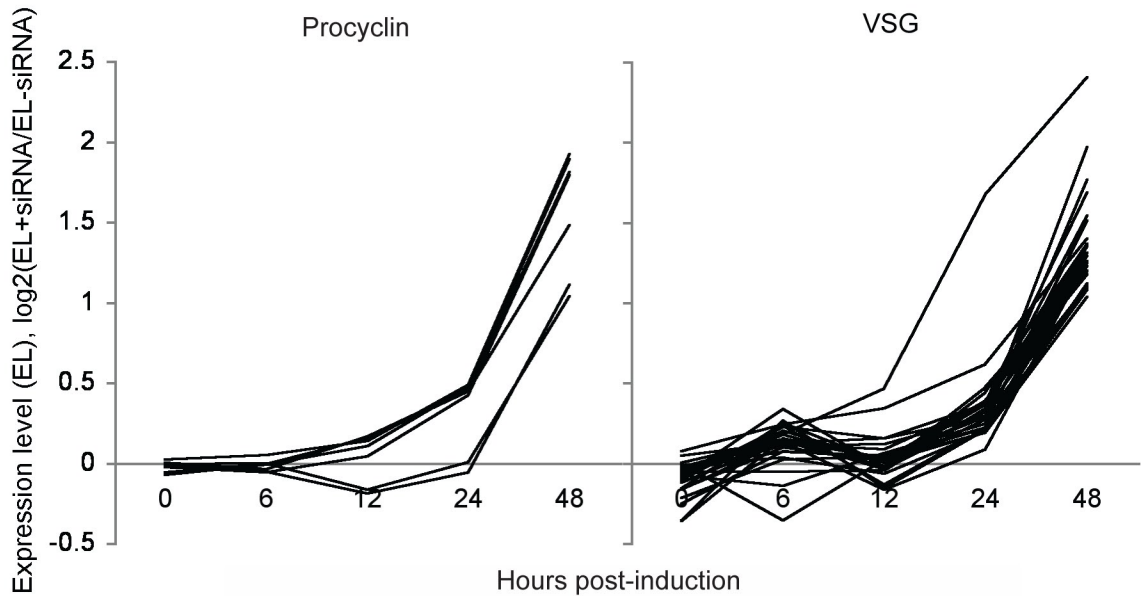**C**

VSG 2

VSG 2 sequencing 45 TGCAAATCCC **CATGCAAAATGGCATAACGATGCGGAAAAACA** AAGTGCACATTGGATAAG  
VSG 2 241 TGCAAATCCC **CATGCAAAATGGCATAACGATGCGGAAAAACA** AAGTGCACATTGGATAAG  
Tb11.57.0084oligo 1 -----GCAAATTTGGTTGAAGAAGAAGGTGGCAAA--AAGCAAGTGCACATTGGATGCA

VSG 2 sequencing 105 GAGGAGGCCAAAAAAGGTAGCAGATGAGACTGCAAAAGATGGGAAAACTGGAAACACAAAC  
VSG 2 301 GAGGAGGCCAAAAAAGGTAGCAGATGAGACTGCAAAAGATGGGAAAACTGGAAACACAAAC  
Tb11.57.0084oligo 51 AAAGCAGCTA-----

VSG 21

VSG 21 241 CAAAGTTGATACTGAGAAAAAGATGACAAATCGTTTTCTAGCAATGTGAGAGTGTCTGT  
VSG 21 sequencing 108 CAAAGTTGATACTGAGAAAAAGATGACAAATCGTTTTCTAGCAATGTGAGAGTGTCTGT  
Tb09.244.0640oligo 1 -----AGCAATGTGAGAGTGTCTGT

VSG 21 301 TCCTCAGGTATTTGCTGCGTTAGTTTTGGCTGCAATTCCTAAGAATTCTGAC  
VSG 21 sequencing 168 TCCTCAGGTATTTGCTGCGTTAGTTTTGGCTGCAATTCCTAAGAATTCT---  
Tb09.244.0640oligo 21 TCCTCACGTTGTTTCTGCAATTTGCTGCC-TTGCCTTTTCTAA-----

VSG 16

VSG 16 61 ATCAGAGAAGTCAACTTCCGAAGCAGACGTAACGTGCGAAAAAGAAAGGAACAGGAGATAA  
VSG 16 sequencing 1 -----CTTCCGAN-CANACGTAACGTGCGAAA-GAAAGGAACAGGAGATAA  
Tb927.4.5530oligo 1 -----GCA

VSG 16 121 CTGCAAAGATGGATGTAAAGAAGTCGAAGAAGGTGGAAAAAAGAAGTGCCTAAAGGATCC  
VSG 16 sequencing 45 CTGCAAAGATGGATGTAAAGAAGTCGAAGAAGGTGGAAAAAAGAAGTGCCTAAAGGATCC  
Tb927.4.5530oligo 3 TGGCAAAGATGGCTGCAAAAGAAATCAGTGAAACGGCCAAAAGAAGTGCCTAGTGGAT--

VSG 17

VSG 17 241 TAAAACAAACACCA**CAGGAAGTAATTCTCTTGTGATTAAAAAGCGCCCTCTTTTGCTTGC**  
VSG 17 sequencing 142 TAAAACAAACACCA**CAGGAAGTAATTCTCTTGTGATTAAAAAGCGCCCTCTTTTGCTTGC**  
Tb09.244.1790oligo 1 -----GGAGCAGTTGTTATTTCTGCTGTGATTAA---TGCCCTCTTTTGCTTGC

VSG 17 301 ATTTTTGATTCTAGCATAACTTTCCCCCTC-----  
VSG 17 sequencing 202 ATTTTTGATTCTAGCATAACTTTCCCCCTCATATTTCCCTCTTTTTAAATTTTCCTTG  
Tb09.244.1790oligo 48 ATTTTTGATTCTA-----
