# Supplementary material for: NUP-1 Is a Large Coiled-Coil Nucleoskeletal Protein in Trypanosomes with Lamin-Like Functions
Source: PubMed Central journal article supplement (PMC3313915; doi:10.1371/journal.pbio.1001287), 2012-03-27

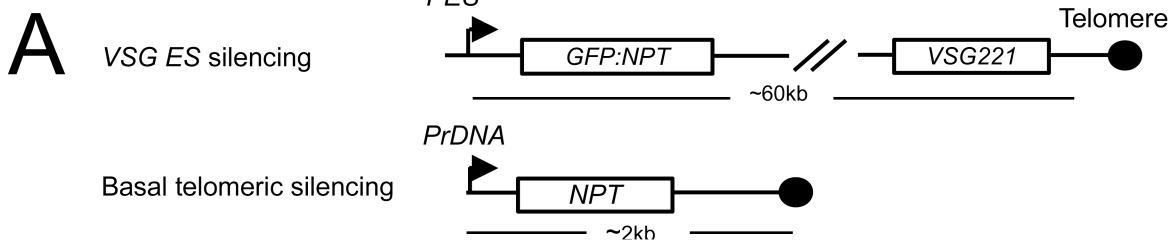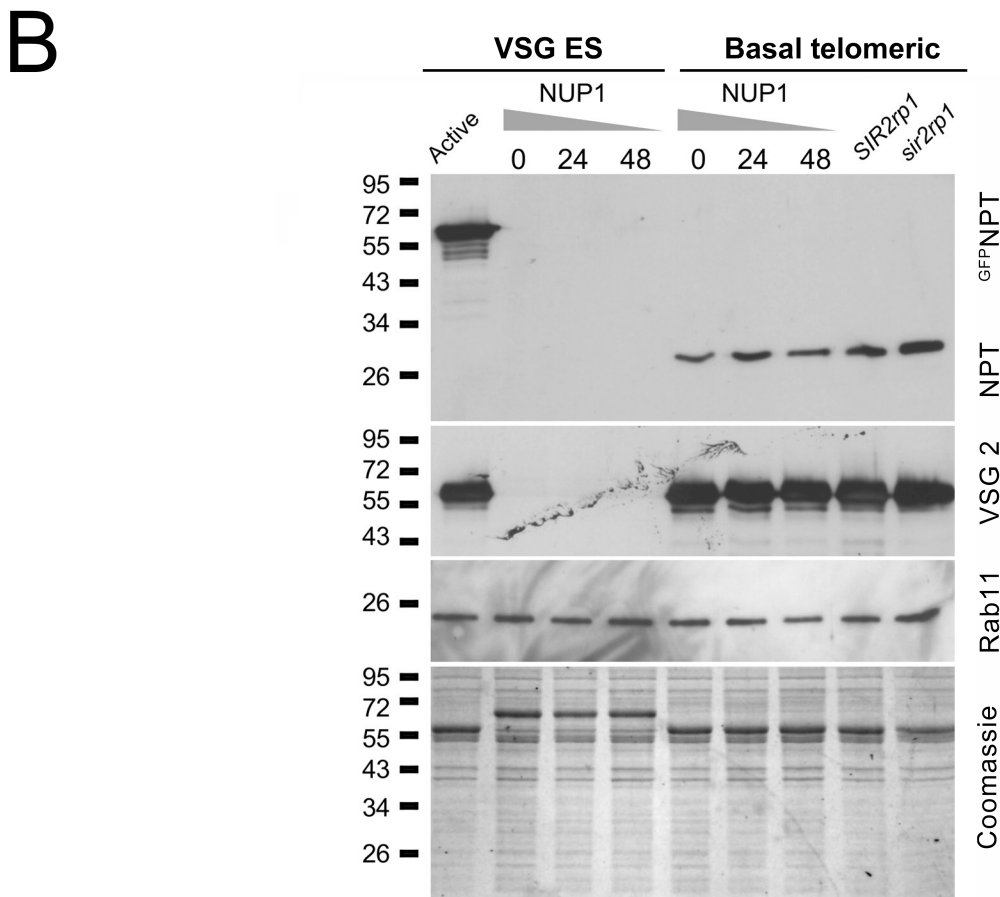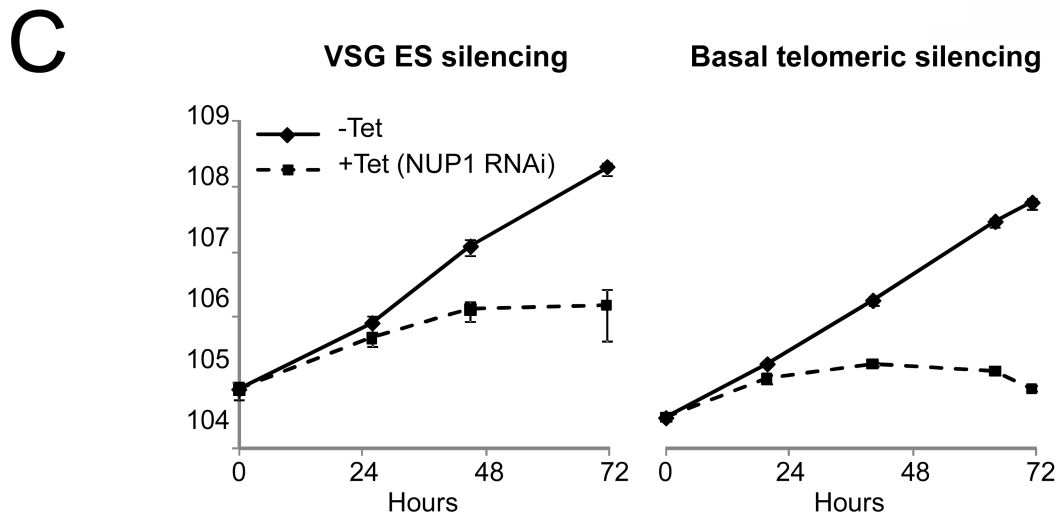

Supplement: pbio.1001287.s004.pdf [file pbio.1001287.s004.pdf]
