# Supplementary material for: NUP-1 Is a Large Coiled-Coil Nucleoskeletal Protein in Trypanosomes with Lamin-Like Functions
Source: PubMed Central journal article supplement (PMC3313915; doi:10.1371/journal.pbio.1001287), 2012-03-27
Supplement: pbio.1001287.s012.pdf [file pbio.1001287.s012.pdf]

**Species****Accession number**

|                                |                                                        |
|--------------------------------|--------------------------------------------------------|
| <i>Trypanosoma brucei</i>      | Tb927.2.4230                                           |
| <i>Trypanosoma gambiense</i>   | Tbg.972.2.2350, Tbg.972.2.2360                         |
| <i>Trypanosoma cruzi</i>       | AAS44545.2, Tc00.1047053511617.9, Tc00.1047053509099.5 |
| <i>Trypanosoma vivax</i>       | TvY486_0201120, TvY486_0039210                         |
| <i>Trypanosoma congolense</i>  | TclL3000.2.710                                         |
| <i>Leishmania major</i>        | LmjF27.1820                                            |
| <i>Leishmania infantum</i>     | LinJ27_V3.1720                                         |
| <i>Leishmania braziliensis</i> | LbrM27_V2.1960                                         |
