# Supplementary material for: NUP-1 Is a Large Coiled-Coil Nucleoskeletal Protein in Trypanosomes with Lamin-Like Functions
Source: PubMed Central journal article supplement (PMC3313915; doi:10.1371/journal.pbio.1001287), 2012-03-27
Supplement: pbio.1001287.s013.pdf [file pbio.1001287.s013.pdf]

|                        | <i>T. brucei</i> | <i>T. gambiense</i> | <i>T. cruzi</i> | <i>T. vivax</i> | <i>T. congolense</i> | <i>L. major</i> | <i>L. infantum</i> | <i>L. braziliensis</i> |
|------------------------|------------------|---------------------|-----------------|-----------------|----------------------|-----------------|--------------------|------------------------|
| <i>T. brucei</i>       |                  | 100                 | 59.76           | 50              | 43.35                | 13.67           | 14.06              | 14.45                  |
| <i>T. gambiense</i>    | 98.82            |                     | 59.76           | 50              | 43.35                | 13.67           | 14.06              | 14.45                  |
| <i>T. cruzi</i>        | 51.17            | 51.56               |                 | 50.39           | 54.29                | 21.48           | 23.04              | 21.09                  |
| <i>T. vivax</i>        | 43.75            | 44.14               | 45.7            |                 | 54.29                | 17.57           | 18.75              | 18.75                  |
| <i>T. congolense</i>   | 35.54            | 35.54               | 46.87           | 48.04           |                      | 18.75           | 20.7               | 19.92                  |
| <i>L. major</i>        | 8.98             | 8.98                | 11.32           | 10.93           | 10.93                |                 | 94.92              | 83.2                   |
| <i>L. infantum</i>     | 9.76             | 9.76                | 12.5            | 10.93           | 11.32                | 92.96           |                    | 85.15                  |
| <i>L. braziliensis</i> | 8.98             | 8.98                | 11.32           | 11.32           | 10.93                | 75.39           | 75.39              |                        |
